# Supplementary material
Source: PubMed Central journal article supplement (PMC5528780)
Supplement: MOL2-9-758-s002.pdf [file MOL2-9-758-s002.pdf]

Table S9: Validated miRNA and mRNA interactions

## 1. ATM Signalling

| miRNA        | mRNA   | Pubmed id Reference |
|--------------|--------|---------------------|
| hsa-miR-215  | CDKN1A | 19074875            |
| hsa-miR-215  | TP53   | 19074875            |
| hsa-miR-215  | MDM2   | 20951946            |
| hsa-miR-192  | TP53   | 20647341            |
| hsa-miR-192  | CDKN1A | 20647341            |
| hsa-miR-192  | BRCA1  | 19205878            |
| hsa-miR-192  | MDM2   | 20951946            |
| hsa-miR-194  | MDM2   | 20951946            |
| hsa-miR-194  | CDKN1A | 19074875            |
| hsa-miR-194  | JUN    | 19074548            |
| hsa-miR-194  | TP53   | 19074875            |
| hsa-miR-203  | ABL1   | 18538729            |
| hsa-miR-203  | JUN    | 22205737            |
| hsa-miR-203  | TP53   | 20216554            |
| hsa-miR-203  | MAPK8  | 22205737            |
| hsa-miR-203  | CDKN1A | 20219920            |
| hsa-miR-196a | NFKB1  | 18408758            |
| hsa-miR-196a | CDKN1A | 19773200            |
| hsa-miR-196b | JUN    | 19074548            |
| hsa-miR-1    | MDM2   | 19229884            |
| hsa-miR-1    | JUN    | 19074548            |
| hsa-miR-1    | CDKN1A | 18676839            |
| hsa-miR-1    | TP53   | 19229884            |
| hsa-miR-1    | RELA   | 15685193            |
| hsa-miR-192* | TP53   | 19088023            |
| hsa-miR-192* | CDKN1A | 20647341            |
| hsa-miR-192* | BRCA1  | 19205878            |
| hsa-miR-192* | MDM2   | 20951946            |
| hsa-miR-146a | MAPK8  | 20859756            |
| hsa-miR-146a | RELA   | 20061417            |
| hsa-miR-146a | NFKB1  | 19021527            |
| hsa-miR-146a | BRCA1  | 19944095            |
| hsa-miR-146a | JUN    | 21773870            |
| hsa-miR-146a | TP53   | 20733155            |
| hsa-miR-146a | NFKBIA | 19635561            |
| hsa-miR-146a | CDKN1A | 20101223            |
| hsa-miR-145  | TP53   | 20351064            |
| hsa-miR-145  | JUN    | 19074548            |
| hsa-miR-145  | CDKN1A | 20716115            |
| hsa-miR-145  | TP73   | 20485546            |
| hsa-miR-20a  | CDKN1A | 20190813            |
| hsa-miR-20a  | TP53   | 20868483            |
| hsa-miR-20a  | BRCA1  | 20167074            |

|                 |        |          |
|-----------------|--------|----------|
| hsa-miR-20a     | JUN    | 19074548 |
| hsa-miR-17      | TP53   | 18728182 |
| hsa-miR-17      | CDKN1A | 19782699 |
| hsa-miR-17      | BRCA1  | 23160909 |
| hsa-miR-17      | RELA   | 20144951 |
| hsa-miR-17      | ATM    | 19477219 |
| hsa-miR-18a     | TP53   | 21388952 |
| hsa-miR-18a     | ATM    | 23229340 |
| hsa-miR-28-5p   | CDKN1A | 20190813 |
| hsa-miR-28-5p   | TP53   | 20923760 |
| hsa-miR-378*    | TP53   | 20078964 |
| hsa-miR-20b     | CDKN1A | 18212054 |
| hsa-miR-19a     | TP53   | 20868483 |
| hsa-miR-19a     | CDKN1A | 20851997 |
| hsa-miR-19a     | BRCA1  | 20167074 |
| hsa-miR-19b     | CDKN1A | 20089119 |
| hsa-miR-19b     | TP53   | 18728182 |
| hsa-miR-204     | TP53   | 19074875 |
| hsa-miR-204     | CDKN1A | 19074875 |
| hsa-miR-127-3p  | JUN    | 19396864 |
| hsa-miR-377     | CDKN1A | 18716028 |
| hsa-miR-214     | CDKN1A | 20716115 |
| hsa-miR-214     | JUN    | 20498046 |
| hsa-miR-214     | MAPK8  | 19859982 |
| hsa-miR-199a-5p | NFKB1  | 18408758 |
| hsa-miR-199a-5p | MAPK8  | 18456660 |
| hsa-miR-381     | BRCA1  | 20167074 |
| hsa-miR-410     | NFKB1  | 21170085 |
| hsa-miR-410     | TP53   | 21170085 |
| hsa-miR-410     | JUN    | 21170085 |
| hsa-miR-218     | NFKB1  | 20933503 |
| hsa-miR-654-3p  | CDKN1A | 20190813 |
| hsa-miR-154*    | BRCA1  | 20167074 |
| hsa-miR-99a     | TP53   | 19843843 |
| hsa-miR-99a     | NFKB1  | 20497147 |
| hsa-miR-99a     | JUN    | 19074548 |
| hsa-miR-199a-3p | NFKB1  | 18408758 |
| hsa-miR-199a-3p | MAPK8  | 18456660 |
| hsa-miR-100     | TP53   | 20078964 |
| hsa-miR-100     | JUN    | 19074548 |
| hsa-miR-125b    | TP53   | 22245495 |
| hsa-miR-125b    | RELA   | 22581933 |
| hsa-miR-125b    | CDKN1A | 20827722 |
| hsa-miR-125b    | NFKBIA | 20435889 |
| hsa-miR-125b    | BRCA1  | 19048628 |
| hsa-miR-125b    | MDM2   | 20542030 |

|                 |        |          |
|-----------------|--------|----------|
| hsa-miR-125b    | ATM    | 18674748 |
| hsa-miR-125b    | JUN    | 19074548 |
| hsa-miR-299-5p  | CDKN1A | 20190813 |
| hsa-miR-154     | BRCA1  | 20167074 |
| hsa-miR-214*    | CDKN1A | 20716115 |
| hsa-miR-214*    | JUN    | 20498046 |
| hsa-miR-214*    | MAPK8  | 19859982 |
| hsa-miR-379     | JUN    | 19396864 |
| hsa-miR-299-3p  | JUN    | 19396864 |
| hsa-miR-130a    | RELA   | 20144951 |
| hsa-miR-130a    | TP53   | 19948396 |
| hsa-miR-369-5p  | BRCA1  | 20810544 |
| hsa-miR-337-3p  | CDKN1A | 23137536 |
| hsa-miR-337-3p  | TP53   | 23137536 |
| hsa-miR-125b-2* | BRCA1  | 19048628 |
| hsa-miR-125b-2* | TP53   | 19818772 |
| hsa-miR-433     | NFKB1  | 20497147 |
| hsa-miR-377*    | CDKN1A | 18716028 |

## 2. ATR Signalling

| miRNA          | mRNA   | Pubmed id | Reference |
|----------------|--------|-----------|-----------|
| hsa-miR-192    | RAD9A  | 19205878  |           |
| hsa-miR-196a   | MCM2   | 21293479  |           |
| hsa-miR-196a   | ERCC4  | 21293479  |           |
| hsa-miR-1      | PLK1   | 18668040  |           |
| hsa-miR-1      | MCM7   | 18676839  |           |
| hsa-miR-192*   | RAD9A  | 19205878  |           |
| hsa-miR-146a   | CCNA2  | 19944095  |           |
| hsa-miR-146a   | BRCA2  | 20810544  |           |
| hsa-miR-145    | FBXW11 | 15131085  |           |
| hsa-miR-20a    | CDK2   | 22731656  |           |
| hsa-miR-17     | MCM7   | 21538479  |           |
| hsa-miR-17     | CDK2   | 22731656  |           |
| hsa-miR-17     | BRCA2  | 20810544  |           |
| hsa-miR-18a    | CDK2   | 22731656  |           |
| hsa-miR-19a    | CDK2   | 22731656  |           |
| hsa-miR-19b    | CDK2   | 22731656  |           |
| hsa-miR-100    | PLK1   | 22246341  |           |
| hsa-miR-100    | CDC25C | 19739117  |           |
| hsa-miR-369-5p | BRCA2  | 20810544  |           |

### 3.DNA repair Signalling

| miRNA           | mRNA   | Pubmed id | Reference |
|-----------------|--------|-----------|-----------|
| hsa-miR-192     | BRCA1  | 19205878  |           |
| hsa-miR-1       | POLR2C | 18668040  |           |
| hsa-miR-1       | POLD2  | 18668040  |           |
| hsa-miR-1       | MAD2L2 | 15685193  |           |
| hsa-miR-192*    | BRCA1  | 19205878  |           |
| hsa-miR-146a    | BRCA2  | 20810544  |           |
| hsa-miR-146a    | BRCA1  | 19944095  |           |
| hsa-miR-145     | POLD3  | 19626115  |           |
| hsa-miR-145     | H2AFX  | 21849299  |           |
| hsa-miR-145     | ERCC8  | 20089806  |           |
| hsa-miR-20a     | H2AFX  | 19597473  |           |
| hsa-miR-20a     | BRCA1  | 20167074  |           |
| hsa-miR-17      | H2AFX  | 19597473  |           |
| hsa-miR-17      | BRCA2  | 20810544  |           |
| hsa-miR-17      | BRCA1  | 23160909  |           |
| hsa-miR-17      | ATM    | 19477219  |           |
| hsa-miR-18a     | ATM    | 23229340  |           |
| hsa-miR-19a     | BRCA1  | 20167074  |           |
| hsa-miR-381     | BRCA1  | 20167074  |           |
| hsa-miR-154*    | BRCA1  | 20167074  |           |
| hsa-miR-125b    | BRCA1  | 19048628  |           |
| hsa-miR-125b    | ATM    | 18674748  |           |
| hsa-miR-154     | BRCA1  | 20167074  |           |
| hsa-miR-130a    | H2AFX  | 20505758  |           |
| hsa-miR-369-5p  | BRCA2  | 20810544  |           |
| hsa-miR-369-5p  | BRCA1  | 20810544  |           |
| hsa-miR-125b-2* | BRCA1  | 19048628  |           |

#### 4.E2F Signalling

| miRNA        | mRNA     | Pubmed id Reference |
|--------------|----------|---------------------|
| hsa-miR-215  | CDKN1A   | 20647341            |
| hsa-miR-215  | MCL1     | 19074875            |
| hsa-miR-215  | PAK3     | 18810376            |
| hsa-miR-215  | TYMS     | 20647341            |
| hsa-miR-192  | BRCA1    | 19205878            |
| hsa-miR-192  | CDKN1A   | 19088023            |
| hsa-miR-192  | MCL1     | 19074875            |
| hsa-miR-192  | PAK3     | 18798260            |
| hsa-miR-192  | TFE3     | 21389977            |
| hsa-miR-192  | TYMS     | 20647341            |
| hsa-miR-194  | CDKN1A   | 19074875            |
| hsa-miR-194  | EP300    | 19569050            |
| hsa-miR-194  | MCL1     | 19074875            |
| hsa-miR-194  | MYC      | 18451220            |
| hsa-miR-203  | CDKN1A   | 20219920            |
| hsa-miR-203  | CDKN2A   | 19396864            |
| hsa-miR-203  | E2F3     | 19864316            |
| hsa-miR-203  | MCL1     | 18381414            |
| hsa-miR-203  | WASF1    | 21368580            |
| hsa-miR-196a | CEBPA    | 21818844            |
| hsa-miR-1    | CDKN1A   | 19229884            |
| hsa-miR-1    | CEBPA    | 18818206            |
| hsa-miR-1    | E2F1     | 18676839            |
| hsa-miR-1    | E2F3     | 18519660            |
| hsa-miR-1    | E2F7     | 22330340            |
| hsa-miR-1    | MYC      | 23022474            |
| hsa-miR-1    | TYMS     | 18668040            |
| hsa-miR-133b | CEBPA    | 20368543            |
| hsa-miR-133b | MCL1     | 20056941            |
| hsa-miR-133b | MYC      | 18451220            |
| hsa-miR-192* | BRCA1    | 19205878            |
| hsa-miR-192* | CDKN1A   | 18798260            |
| hsa-miR-192* | MCL1     | 19074875            |
| hsa-miR-192* | PAK3     | 18798260            |
| hsa-miR-192* | TFE3     | 21389977            |
| hsa-miR-192* | TYMS     | 20647341            |
| hsa-miR-146a | BRCA1    | 20810544            |
| hsa-miR-146a | CCNA2    | 19944095            |
| hsa-miR-146a | CDKN1A   | 20101223            |
| hsa-miR-146a | CDKN2A   | 22213426            |
| hsa-miR-146a | EP300    | 21885871            |
| hsa-miR-146a | PLAU     | 19585508            |
| hsa-miR-146a | SERPINE1 | 20053980            |
| hsa-miR-145  | CDKN1A   | 20089806            |

|               |          |          |
|---------------|----------|----------|
| hsa-miR-145   | E2F3     | 17891175 |
| hsa-miR-145   | MCL1     | 17891175 |
| hsa-miR-145   | MYC      | 23291449 |
| hsa-miR-145   | PAK3     | 20190813 |
| hsa-miR-133a  | CDKN2A   | 22037549 |
| hsa-miR-133a  | CEBPA    | 20368543 |
| hsa-miR-133a  | MCL1     | 20056941 |
| hsa-miR-133a  | MYC      | 18451220 |
| hsa-miR-20a   | BRCA1    | 20167074 |
| hsa-miR-20a   | CDK2     | 22731656 |
| hsa-miR-20a   | CDKN1A   | 20851997 |
| hsa-miR-20a   | CDKN2A   | 18719372 |
| hsa-miR-20a   | E2F1     | 18836483 |
| hsa-miR-20a   | E2F2     | 17135249 |
| hsa-miR-20a   | E2F3     | 17135249 |
| hsa-miR-20a   | MYC      | 20851997 |
| hsa-miR-20a   | PAK3     | 20190813 |
| hsa-miR-20a   | RB1      | 16461460 |
| hsa-miR-17    | ATM      | 19477219 |
| hsa-miR-17    | BRCA1    | 19048628 |
| hsa-miR-17    | CDK2     | 22731656 |
| hsa-miR-17    | CDKN1A   | 18212054 |
| hsa-miR-17    | CDKN1B   | 17586726 |
| hsa-miR-17    | CDKN2A   | 18765795 |
| hsa-miR-17    | E2F1     | 18644370 |
| hsa-miR-17    | E2F2     | 17135249 |
| hsa-miR-17    | E2F3     | 17135249 |
| hsa-miR-17    | MCL1     | 19347736 |
| hsa-miR-17    | MYC      | 18327259 |
| hsa-miR-17    | PAK3     | 19782699 |
| hsa-miR-17    | RB1      | 20643754 |
| hsa-miR-17    | RBL2     | 18287052 |
| hsa-miR-18a   | ATM      | 23229340 |
| hsa-miR-18a   | CDK2     | 22731656 |
| hsa-miR-18a   | E2F1     | 18025036 |
| hsa-miR-18a   | MYC      | 19706389 |
| hsa-miR-18a   | RB1      | 21388952 |
| hsa-miR-28-5p | CDKN1A   | 20190813 |
| hsa-miR-28-5p | CDKN2A   | 20923760 |
| hsa-miR-28-5p | PAK3     | 20190813 |
| hsa-miR-378*  | MYC      | 21242960 |
| hsa-miR-378*  | SERPINE1 | 20353610 |
| hsa-miR-378*  | SULT2A1  | 20484008 |
| hsa-miR-20b   | CDKN1A   | 20190813 |
| hsa-miR-20b   | E2F1     | 15944709 |
| hsa-miR-20b   | MYC      | 19706389 |

|                 |        |          |
|-----------------|--------|----------|
| hsa-miR-20b     | PAK3   | 20190813 |
| hsa-miR-19a     | BRCA1  | 20167074 |
| hsa-miR-19a     | CDK2   | 22731656 |
| hsa-miR-19a     | CDKN1A | 20851997 |
| hsa-miR-19a     | MYC    | 22731656 |
| hsa-miR-19a     | RB1    | 21388952 |
| hsa-miR-19b     | CDK2   | 22731656 |
| hsa-miR-19b     | CDKN1A | 20851997 |
| hsa-miR-19b     | E2F1   | 18025036 |
| hsa-miR-19b     | MYC    | 21664042 |
| hsa-miR-18b     | E2F1   | 15944709 |
| hsa-miR-18b     | MYC    | 15944709 |
| hsa-miR-18b     | RBL2   | 21327300 |
| hsa-miR-204     | CDKN1A | 19074875 |
| hsa-miR-204     | E2F3   | 19864316 |
| hsa-miR-204     | MCL1   | 19070389 |
| hsa-miR-204     | SIRT1  | 22364258 |
| hsa-miR-127-3p  | CDKN2A | 19396864 |
| hsa-miR-127-3p  | E2F3   | 18942116 |
| hsa-miR-127-3p  | MYC    | 19530237 |
| hsa-miR-377     | CDKN1A | 18716028 |
| hsa-miR-214     | CDKN1A | 20534588 |
| hsa-miR-214     | CDKN2A | 22037549 |
| hsa-miR-214     | MCL1   | 22418008 |
| hsa-miR-214     | MYC    | 20716115 |
| hsa-miR-199a-5p | SIRT1  | 20193759 |
| hsa-miR-381     | BRCA1  | 20167074 |
| hsa-miR-410     | CDKN2A | 21170085 |
| hsa-miR-410     | RB1    | 21170085 |
| hsa-miR-654-3p  | CDKN1A | 20190813 |
| hsa-miR-654-3p  | PAK3   | 20190813 |
| hsa-miR-154*    | BRCA1  | 20167074 |
| hsa-miR-154*    | MYC    | 18451220 |
| hsa-miR-99a     | CDKN2A | 17674361 |
| hsa-miR-99a     | MYC    | 18451220 |
| hsa-miR-199a-3p | RB1    | 21049042 |
| hsa-miR-136*    | RB1    | 21049042 |
| hsa-miR-100     | MYC    | 18451220 |
| hsa-miR-100     | SIRT1  | 20439489 |
| hsa-miR-125b    | APAF1  | 21879257 |
| hsa-miR-125b    | ATM    | 18674748 |
| hsa-miR-125b    | BRCA1  | 19048628 |
| hsa-miR-125b    | CASP7  | 18056640 |
| hsa-miR-125b    | CDKN1A | 21118985 |
| hsa-miR-125b    | CDKN2A | 20347935 |
| hsa-miR-125b    | CEBPA  | 20806079 |

|                 |         |          |
|-----------------|---------|----------|
| hsa-miR-125b    | E2F1    | 20428827 |
| hsa-miR-125b    | E2F3    | 20049626 |
| hsa-miR-125b    | EP300   | 22245495 |
| hsa-miR-125b    | MCL1    | 22252650 |
| hsa-miR-125b    | MYC     | 18451220 |
| hsa-miR-125b    | RB1     | 20049626 |
| hsa-miR-125b    | SULT2A1 | 18230348 |
| hsa-miR-299-5p  | CDKN1A  | 20190813 |
| hsa-miR-299-5p  | PAK3    | 20190813 |
| hsa-miR-154     | BRCA1   | 20167074 |
| hsa-miR-154     | MYC     | 18451220 |
| hsa-miR-214*    | CDKN1A  | 20534588 |
| hsa-miR-214*    | CDKN2A  | 22037549 |
| hsa-miR-214*    | MCL1    | 22418008 |
| hsa-miR-214*    | MYC     | 20716115 |
| hsa-miR-379     | CDKN2A  | 19396864 |
| hsa-miR-299-3p  | CDKN2A  | 19396864 |
| hsa-miR-369-5p  | BRCA1   | 20810544 |
| hsa-miR-337-3p  | CDKN1A  | 23137536 |
| hsa-miR-125b-2* | APAF1   | 21879257 |
| hsa-miR-125b-2* | BRCA1   | 19048628 |
| hsa-miR-125b-2* | CDKN2A  | 17674361 |
| hsa-miR-125b-2* | E2F1    | 20428827 |
| hsa-miR-125b-2* | E2F3    | 20428827 |
| hsa-miR-125b-2* | RB1     | 20049626 |
| hsa-miR-377*    | CDKN1A  | 18716028 |
| hsa-miR-196a    | CDKN1A  | 19773200 |

## 5. Glucose metabolism Signalling

| miRNA        | mRNA    | Pubmed id | Reference |
|--------------|---------|-----------|-----------|
| hsa-miR-1    | ALDH9A1 | 15685193  |           |
| hsa-miR-1    | GAPDH   | 21177382  |           |
| hsa-miR-1    | PGM1    | 15685193  |           |
| hsa-miR-133b | PKM2    | 18464261  |           |
| hsa-miR-145  | PGK1    | 20948521  |           |
| hsa-miR-133a | PKM2    | 18464261  |           |

## 6. Insulin receptor repair and recycling Signalling

| miRNA        | mRNA   | Pubmed id | Reference |
|--------------|--------|-----------|-----------|
| hsa-miR-192  | AKT1   | 19543271  |           |
| hsa-miR-192  | KRAS   | 19047896  |           |
| hsa-miR-192  | PIK3CA | 19047896  |           |
| hsa-miR-192  | BRAF   | 19047896  |           |
| hsa-miR-194  | AKT1   | 19074548  |           |
| hsa-miR-194  | IRS1   | 21183973  |           |
| hsa-miR-194  | JUN    | 19074548  |           |
| hsa-miR-203  | AKT1   | 21248297  |           |
| hsa-miR-203  | FOS    | 19759552  |           |
| hsa-miR-203  | JUN    | 19396864  |           |
| hsa-miR-203  | KRAS   | 20216554  |           |
| hsa-miR-203  | NRAS   | 20216554  |           |
| hsa-miR-203  | MAPK8  | 22205737  |           |
| hsa-miR-203  | SOCS3  | 17622355  |           |
| hsa-miR-196a | AKT1   | 19418581  |           |
| hsa-miR-196a | IKBKB  | 18408758  |           |
| hsa-miR-196b | AKT1   | 19074548  |           |
| hsa-miR-196b | JUN    | 19074548  |           |
| hsa-miR-1    | AKT1   | 19074548  |           |
| hsa-miR-1    | FOXO1  | 22330340  |           |
| hsa-miR-1    | FOS    | 21497762  |           |
| hsa-miR-1    | FRAP1  | 20566686  |           |
| hsa-miR-1    | GYS1   | 18668040  |           |
| hsa-miR-1    | ARAF   | 15685193  |           |
| hsa-miR-1    | JUN    | 18668040  |           |
| hsa-miR-1    | PDE3A  | 18668040  |           |
| hsa-miR-1    | PIK3CA | 20959496  |           |
| hsa-miR-1    | SHC3   | 15685193  |           |
| hsa-miR-1    | PRKACA | 19229884  |           |
| hsa-miR-1    | PRKCI  | 18668040  |           |
| hsa-miR-1    | PTPRF  | 18668040  |           |
| hsa-miR-1    | RHEB   | 17234972  |           |
| hsa-miR-1    | SREBF1 | 19720801  |           |
| hsa-miR-1    | SRF    | 16380711  |           |
| hsa-miR-1    | BRAF   | 21537871  |           |
| hsa-miR-1    | TSC1   | 20978860  |           |
| hsa-miR-1    | CALM1  | 22719074  |           |
| hsa-miR-133b | PIK3CA | 20959496  |           |
| hsa-miR-133b | PKM2   | 18464261  |           |
| hsa-miR-133b | SLC2A4 | 19720047  |           |
| hsa-miR-133b | SRF    | 16380711  |           |
| hsa-miR-192* | AKT1   | 19543271  |           |
| hsa-miR-192* | KRAS   | 19047896  |           |
| hsa-miR-192* | PIK3CA | 19047896  |           |

|              |          |          |
|--------------|----------|----------|
| hsa-miR-192* | BRAF     | 19047896 |
| hsa-miR-146a | FASN     | 19596990 |
| hsa-miR-146a | FOS      | 19635561 |
| hsa-miR-146a | IKBKB    | 20525168 |
| hsa-miR-146a | JUN      | 19635561 |
| hsa-miR-146a | MAPK3    | 21060679 |
| hsa-miR-146a | MAPK8    | 20525168 |
| hsa-miR-146a | SOCS1    | 19635561 |
| hsa-miR-146a | SOCS2    | 22524533 |
| hsa-miR-146a | SOCS3    | 17622355 |
| hsa-miR-145  | EIF4EBP1 | 17891175 |
| hsa-miR-145  | AKT1     | 19074548 |
| hsa-miR-145  | FRAP1    | 20382746 |
| hsa-miR-145  | IRS1     | 17827156 |
| hsa-miR-145  | JUN      | 19074548 |
| hsa-miR-145  | KRAS     | 21159816 |
| hsa-miR-145  | NRAS     | 23201159 |
| hsa-miR-145  | PIK3CA   | 23104321 |
| hsa-miR-145  | MAPK3    | 23104321 |
| hsa-miR-145  | RPS6KB1  | 20382746 |
| hsa-miR-145  | SRF      | 19720868 |
| hsa-miR-145  | TSC2     | 20382746 |
| hsa-miR-145  | IRS2     | 22431718 |
| hsa-miR-133a | PIK3CA   | 20959496 |
| hsa-miR-133a | PKM2     | 18464261 |
| hsa-miR-133a | RHEB     | 18827171 |
| hsa-miR-133a | SLC2A4   | 19720047 |
| hsa-miR-133a | SREBF1   | 19720801 |
| hsa-miR-133a | SRF      | 16380711 |
| hsa-miR-20a  | SH2B2    | 21794077 |
| hsa-miR-20a  | AKT1     | 19074548 |
| hsa-miR-20a  | FRAP1    | 20022054 |
| hsa-miR-20a  | JUN      | 19074548 |
| hsa-miR-20a  | KRAS     | 20818338 |
| hsa-miR-17   | AKT1     | 20504959 |
| hsa-miR-17   | FRAP1    | 20022054 |
| hsa-miR-17   | IKBKB    | 20144951 |
| hsa-miR-17   | KRAS     | 16878133 |
| hsa-miR-17   | PIK3CA   | 17586726 |
| hsa-miR-17   | MAPK9    | 18700987 |
| hsa-miR-17   | SOCS1    | 17934639 |
| hsa-miR-18a  | AKT1     | 21402698 |
| hsa-miR-18a  | KRAS     | 19372139 |
| hsa-miR-378* | KRAS     | 21922590 |
| hsa-miR-19a  | AKT1     | 20857258 |
| hsa-miR-19a  | PIK3CA   | 20505335 |

|                 |        |          |
|-----------------|--------|----------|
| hsa-miR-19a     | SOCS1  | 18728182 |
| hsa-miR-194*    | KRAS   | 22851141 |
| hsa-miR-19b     | SH2B2  | 21794077 |
| hsa-miR-19b     | PIK3CA | 20505335 |
| hsa-miR-19b     | SOCS1  | 18728182 |
| hsa-miR-18b     | KRAS   | 20818338 |
| hsa-miR-204     | SOCS1  | 17934639 |
| hsa-miR-204     | SOCS2  | 22524533 |
| hsa-miR-127-3p  | JUN    | 19396864 |
| hsa-miR-127-3p  | KRAS   | 21922590 |
| hsa-miR-127-3p  | RASA1  | 21343399 |
| hsa-miR-214     | SH2B2  | 20498046 |
| hsa-miR-214     | AKT1   | 18199536 |
| hsa-miR-214     | IKBKB  | 20400975 |
| hsa-miR-214     | JUN    | 20498046 |
| hsa-miR-214     | KRAS   | 21543894 |
| hsa-miR-214     | NRAS   | 20534588 |
| hsa-miR-214     | MAPK8  | 19859982 |
| hsa-miR-199a-5p | AKT1   | 18456660 |
| hsa-miR-199a-5p | FASN   | 20814244 |
| hsa-miR-199a-5p | IKBKB  | 18408758 |
| hsa-miR-199a-5p | INSR   | 20193759 |
| hsa-miR-199a-5p | MAPK1  | 18456660 |
| hsa-miR-199a-5p | MAPK8  | 18456660 |
| hsa-miR-199a-5p | MAPK9  | 18456660 |
| hsa-miR-381     | AKT1   | 21435336 |
| hsa-miR-410     | JUN    | 21170085 |
| hsa-miR-410     | PIK3R2 | 20844033 |
| hsa-miR-218     | CRK    | 19767772 |
| hsa-miR-218     | IKBKB  | 20933503 |
| hsa-miR-218     | KRAS   | 21543894 |
| hsa-miR-218     | PIK3R2 | 20844033 |
| hsa-miR-218     | SOCS1  | 17934639 |
| hsa-miR-99a     | AKT1   | 19074548 |
| hsa-miR-99a     | FASN   | 20497147 |
| hsa-miR-99a     | FRAP1  | 20484036 |
| hsa-miR-99a     | JUN    | 19074548 |
| hsa-miR-199a-3p | AKT1   | 18456660 |
| hsa-miR-199a-3p | FRAP1  | 20501828 |
| hsa-miR-199a-3p | IKBKB  | 18408758 |
| hsa-miR-199a-3p | PIK3CA | 20643939 |
| hsa-miR-199a-3p | MAPK1  | 18456660 |
| hsa-miR-199a-3p | MAPK8  | 18456660 |
| hsa-miR-199a-3p | MAPK9  | 18456660 |
| hsa-miR-100     | AKT1   | 18199536 |
| hsa-miR-100     | FRAP1  | 18596100 |

|                 |          |          |
|-----------------|----------|----------|
| hsa-miR-100     | JUN      | 19074548 |
| hsa-miR-125b    | EIF4EBP1 | 17891175 |
| hsa-miR-125b    | AKT1     | 18199536 |
| hsa-miR-125b    | FRAP1    | 21200031 |
| hsa-miR-125b    | IKBKB    | 20144951 |
| hsa-miR-125b    | JUN      | 19074548 |
| hsa-miR-125b    | KRAS     | 20216554 |
| hsa-miR-125b    | NRAS     | 20216554 |
| hsa-miR-125b    | MAPK3    | 21060679 |
| hsa-miR-125b    | SOCS1    | 19699171 |
| hsa-miR-125b    | SOCS3    | 17622355 |
| hsa-miR-214*    | SH2B2    | 20498046 |
| hsa-miR-214*    | AKT1     | 18199536 |
| hsa-miR-214*    | IKBKB    | 20400975 |
| hsa-miR-214*    | JUN      | 20498046 |
| hsa-miR-214*    | KRAS     | 21543894 |
| hsa-miR-214*    | NRAS     | 20534588 |
| hsa-miR-214*    | MAPK8    | 19859982 |
| hsa-miR-495     | FLOT2    | 21258409 |
| hsa-miR-495     | KRAS     | 20818338 |
| hsa-miR-495     | PIK3CA   | 20728239 |
| hsa-miR-379     | JUN      | 19396864 |
| hsa-miR-382     | AKT1     | 19401561 |
| hsa-miR-376b    | FRAP1    | 22248718 |
| hsa-miR-299-3p  | FOXO1    | 23380809 |
| hsa-miR-299-3p  | JUN      | 19396864 |
| hsa-miR-130a    | AKT1     | 22525256 |
| hsa-miR-130a    | FOS      | 21293178 |
| hsa-miR-130a    | FRAP1    | 21293178 |
| hsa-miR-130a    | IKBKB    | 20144951 |
| hsa-miR-130a    | PIK3CA   | 20505758 |
| hsa-miR-130a    | SREBF1   | 21293178 |
| hsa-miR-337-3p  | CSNK2A1  | 23137536 |
| hsa-miR-337-3p  | AKT1     | 21183973 |
| hsa-miR-337-3p  | IRS1     | 21183973 |
| hsa-miR-337-3p  | SOCS3    | 22894925 |
| hsa-miR-125b-2* | MAPK3    | 21060679 |
| hsa-miR-433     | FASN     | 20497147 |
| hsa-miR-433     | GRB2     | 19531230 |

## 7. Interferon Signalling

| miRNA         | mRNA   | Pubmed id | Reference |
|---------------|--------|-----------|-----------|
| hsa-miR-192   | IFNG   | 21085987  |           |
| hsa-miR-192   | TNF    | 21085987  |           |
| hsa-miR-194   | TNF    | 22419229  |           |
| hsa-miR-203   | IFNG   | 21093440  |           |
| hsa-miR-203   | IL6    | 20981815  |           |
| hsa-miR-203   | TNF    | 18419608  |           |
| hsa-miR-196a  | IFNA1  | 19085952  |           |
| hsa-miR-196b  | IFNA1  | 21070682  |           |
| hsa-miR-1     | IFNA1  | 21070682  |           |
| hsa-miR-1     | IL4    | 19342679  |           |
| hsa-miR-1     | IL13   | 19342679  |           |
| hsa-miR-1     | JAK2   | 19497108  |           |
| hsa-miR-192*  | IFNG   | 21085987  |           |
| hsa-miR-192*  | TNF    | 21085987  |           |
| hsa-miR-146a  | IFNA1  | 19333922  |           |
| hsa-miR-146a  | IFNG   | 18791161  |           |
| hsa-miR-146a  | IL1A   | 20148189  |           |
| hsa-miR-146a  | IL2    | 19965651  |           |
| hsa-miR-146a  | IL6    | 18504431  |           |
| hsa-miR-146a  | IL8    | 20053980  |           |
| hsa-miR-146a  | IL10   | 20435894  |           |
| hsa-miR-146a  | STAT1  | 20850013  |           |
| hsa-miR-146a  | TNF    | 16885212  |           |
| hsa-miR-145   | IFNA1  | 20382746  |           |
| hsa-miR-145   | IFNG   | 20130213  |           |
| hsa-miR-145   | JAK2   | 18508790  |           |
| hsa-miR-145   | STAT1  | 20098684  |           |
| hsa-miR-133a  | IL13   | 20953121  |           |
| hsa-miR-133a  | JAK2   | 19497108  |           |
| hsa-miR-20a   | IFNG   | 21085987  |           |
| hsa-miR-20a   | IL6    | 19390056  |           |
| hsa-miR-20a   | JAK2   | 18773208  |           |
| hsa-miR-20a   | TNF    | 21085987  |           |
| hsa-miR-17    | IL6    | 18728182  |           |
| hsa-miR-17    | JAK2   | 18773208  |           |
| hsa-miR-17    | TNF    | 19949084  |           |
| hsa-miR-18a   | IL6    | 21953462  |           |
| hsa-miR-28-5p | IFNA1  | 21224041  |           |
| hsa-miR-28-5p | JAK2   | 20445018  |           |
| hsa-miR-378*  | IFNA1  | 22649192  |           |
| hsa-miR-378*  | IFNGR1 | 21655975  |           |
| hsa-miR-378*  | IL1A   | 19917630  |           |
| hsa-miR-378*  | JAK2   | 17976518  |           |
| hsa-miR-19a   | IL6    | 18728182  |           |

|                 |       |          |
|-----------------|-------|----------|
| hsa-miR-19a     | IL10  | 22043014 |
| hsa-miR-19b     | IL6   | 18728182 |
| hsa-miR-204     | IL8   | 22524533 |
| hsa-miR-377     | IFNG  | 21085987 |
| hsa-miR-377     | TNF   | 21085987 |
| hsa-miR-99a     | IFNA1 | 20497960 |
| hsa-miR-99a     | IL6   | 20497147 |
| hsa-miR-199a-3p | TNF   | 19572984 |
| hsa-miR-100     | TNF   | 17640343 |
| hsa-miR-125b    | IFNA1 | 20497960 |
| hsa-miR-125b    | IL3   | 19890372 |
| hsa-miR-125b    | IL6   | 20347935 |
| hsa-miR-125b    | IL10  | 21060679 |
| hsa-miR-125b    | TNF   | 18419608 |
| hsa-miR-323-3p  | TNF   | 22562984 |
| hsa-miR-130a    | IL1A  | 17855557 |
| hsa-miR-369-5p  | TNF   | 18048652 |
| hsa-miR-125b-2* | IL3   | 19890372 |
| hsa-miR-125b-2* | IL10  | 21060679 |
| hsa-miR-433     | IL6   | 20497147 |
| hsa-miR-377*    | IFNG  | 21085987 |
| hsa-miR-377*    | TNF   | 21085987 |

## 8.p53 signalling

| miRNA          | mRNA     | Pubmed id | Reference |
|----------------|----------|-----------|-----------|
| hsa-miR-215    | CDKN1A   | 18810376  |           |
| hsa-miR-192    | CDKN1A   | 18798260  |           |
| hsa-miR-192    | CYCS     | 18798260  |           |
| hsa-miR-194    | CDKN1A   | 19074875  |           |
| hsa-miR-203    | CDK6     | 18381414  |           |
| hsa-miR-203    | CDKN1A   | 20219920  |           |
| hsa-miR-196a   | CDKN1A   | 19773200  |           |
| hsa-miR-196b   | CCND1    | 19074548  |           |
| hsa-miR-1      | CDK4     | 15685193  |           |
| hsa-miR-1      | CDK6     | 15685193  |           |
| hsa-miR-133b   | IGF1     | 19695767  |           |
| hsa-miR-133b   | BCL2     | 19654003  |           |
| hsa-miR-192*   | CDKN1A   | 18798260  |           |
| hsa-miR-192*   | CYCS     | 18798260  |           |
| hsa-miR-146a   | CDKN1A   | 20101223  |           |
| hsa-miR-146a   | CDKN2A   | 21730286  |           |
| hsa-miR-145    | CDK4     | 21092188  |           |
| hsa-miR-145    | IGF1     | 19391107  |           |
| hsa-miR-133a   | CDKN2A   | 22037549  |           |
| hsa-miR-133a   | CCND1    | 19015276  |           |
| hsa-miR-20a    | CDK2     | 22731656  |           |
| hsa-miR-20a    | CDKN2A   | 18719372  |           |
| hsa-miR-17     | CDK2     | 22731656  |           |
| hsa-miR-17     | CDKN2A   | 18719372  |           |
| hsa-miR-18a    | CDK2     | 22731656  |           |
| hsa-miR-18a    | PTEN     | 19175831  |           |
| hsa-miR-28-5p  | CDKN1A   | 20190813  |           |
| hsa-miR-28-5p  | CDKN2A   | 20923760  |           |
| hsa-miR-378*   | SERPINE1 | 20353610  |           |
| hsa-miR-378*   | CCND1    | 21242960  |           |
| hsa-miR-20b    | CDKN1A   | 18212054  |           |
| hsa-miR-20b    | PTEN     | 19175831  |           |
| hsa-miR-19a    | CDK2     | 22731656  |           |
| hsa-miR-19a    | PTEN     | 14697198  |           |
| hsa-miR-19b    | CDK2     | 22731656  |           |
| hsa-miR-19b    | PTEN     | 20008935  |           |
| hsa-miR-18b    | E2F1     | 15944709  |           |
| hsa-miR-18b    | PTEN     | 19175831  |           |
| hsa-miR-204    | CDKN1A   | 19074875  |           |
| hsa-miR-127-3p | CDK6     | 17581274  |           |
| hsa-miR-127-3p | BCL2     | 18942116  |           |
| hsa-miR-377    | CDKN1A   | 18716028  |           |
| hsa-miR-214    | CDKN1A   | 20534588  |           |
| hsa-miR-214    | CDKN2A   | 22037549  |           |

|                 |        |          |
|-----------------|--------|----------|
| hsa-miR-199a-5p | MDM4   | 21719775 |
| hsa-miR-199a-5p | CCND1  | 22362728 |
| hsa-miR-410     | CDKN2A | 21170085 |
| hsa-miR-410     | RB1    | 21170085 |
| hsa-miR-654-3p  | CDKN1A | 20190813 |
| hsa-miR-154*    | CCND2  | 21128228 |
| hsa-miR-99a     | CDKN2A | 17674361 |
| hsa-miR-99a     | CCND1  | 19074548 |
| hsa-miR-199a-3p | PTEN   | 20400975 |
| hsa-miR-199a-3p | RB1    | 21049042 |
| hsa-miR-136*    | PTEN   | 21049042 |
| hsa-miR-136*    | RB1    | 21049042 |
| hsa-miR-100     | IGFBP3 | 20206398 |
| hsa-miR-100     | CCND1  | 19074548 |
| hsa-miR-125b    | CDK6   | 19414119 |
| hsa-miR-125b    | CDKN1A | 20827722 |
| hsa-miR-299-5p  | CDKN1A | 20190813 |
| hsa-miR-154     | CCND2  | 21128228 |
| hsa-miR-214*    | CDKN1A | 20534588 |
| hsa-miR-214*    | CDKN2A | 22037549 |
| hsa-miR-495     | MDM4   | 20371173 |
| hsa-miR-379     | CDKN2A | 19396864 |
| hsa-miR-299-3p  | CDKN2A | 19396864 |
| hsa-miR-130a    | PTEN   | 14697198 |
| hsa-miR-130a    | TP53   | 19948396 |
| hsa-miR-485-3p  | BCL2   | 21143953 |
| hsa-miR-337-3p  | CDKN1A | 23137536 |
| hsa-miR-125b-2* | CDKN2A | 17674361 |
| hsa-miR-125b-2* | E2F1   | 20049626 |
| hsa-miR-433     | IGF1   | 20497147 |
| hsa-miR-433     | CCND1  | 22362728 |
| hsa-miR-377*    | CDKN1A | 18716028 |

## 9.p73 signalling

| miRNA        | mRNA     | Pubmed id | Reference |
|--------------|----------|-----------|-----------|
| hsa-miR-215  | PAK3     | 18810376  |           |
| hsa-miR-215  | CDKN1A   | 19074875  |           |
| hsa-miR-192  | PAK3     | 18798260  |           |
| hsa-miR-192  | CDKN1A   | 18798260  |           |
| hsa-miR-194  | MYC      | 18451220  |           |
| hsa-miR-194  | EP300    | 19569050  |           |
| hsa-miR-194  | CDKN1A   | 19074875  |           |
| hsa-miR-203  | CDKN1A   | 20219920  |           |
| hsa-miR-203  | CDK6     | 18381414  |           |
| hsa-miR-203  | BAX      | 20219920  |           |
| hsa-miR-203  | ABL1     | 18538729  |           |
| hsa-miR-196a | CDKN1A   | 19773200  |           |
| hsa-miR-196a | BAX      | 21293479  |           |
| hsa-miR-1    | WT1      | 20368543  |           |
| hsa-miR-1    | RELA     | 15685193  |           |
| hsa-miR-1    | PLK1     | 18668040  |           |
| hsa-miR-1    | MYC      | 23022474  |           |
| hsa-miR-1    | MAPK14   | 15685193  |           |
| hsa-miR-1    | CDKN1A   | 19229884  |           |
| hsa-miR-1    | CDK6     | 15685193  |           |
| hsa-miR-1    | CCNB1    | 23022474  |           |
| hsa-miR-1    | BBC3     | 19229884  |           |
| hsa-miR-133b | WT1      | 20368543  |           |
| hsa-miR-133b | MYC      | 18451220  |           |
| hsa-miR-192* | PAK3     | 18798260  |           |
| hsa-miR-192* | CDKN1A   | 18798260  |           |
| hsa-miR-146a | SERPINE1 | 20053980  |           |
| hsa-miR-146a | RELA     | 19635561  |           |
| hsa-miR-146a | FASN     | 19965651  |           |
| hsa-miR-146a | EP300    | 21885871  |           |
| hsa-miR-146a | CDKN1A   | 20101223  |           |
| hsa-miR-146a | CCNA2    | 19944095  |           |
| hsa-miR-146a | BRCA2    | 20810544  |           |
| hsa-miR-145  | WT1      | 18776121  |           |
| hsa-miR-145  | PAK3     | 20190813  |           |
| hsa-miR-145  | MYC      | 21803762  |           |
| hsa-miR-145  | MAPK14   | 15131085  |           |
| hsa-miR-145  | CDKN1A   | 20190813  |           |
| hsa-miR-133a | WT1      | 20368543  |           |
| hsa-miR-133a | MYC      | 18451220  |           |
| hsa-miR-20a  | RB1      | 16461460  |           |
| hsa-miR-20a  | PAK3     | 20190813  |           |
| hsa-miR-20a  | MYC      | 18632605  |           |
| hsa-miR-20a  | MAPK14   | 19559694  |           |

|                 |          |          |
|-----------------|----------|----------|
| hsa-miR-20a     | CDKN1A   | 18941111 |
| hsa-miR-20a     | CDK2     | 22731656 |
| hsa-miR-17      | RELA     | 20144951 |
| hsa-miR-17      | RB1      | 20643754 |
| hsa-miR-17      | PAK3     | 19782699 |
| hsa-miR-17      | MYC      | 21717010 |
| hsa-miR-17      | MAPK14   | 19559694 |
| hsa-miR-17      | CDKN1A   | 18941111 |
| hsa-miR-17      | CDK2     | 22731656 |
| hsa-miR-17      | BRCA2    | 20810544 |
| hsa-miR-18a     | RB1      | 21388952 |
| hsa-miR-18a     | MYC      | 19706389 |
| hsa-miR-18a     | CDK2     | 22731656 |
| hsa-miR-28-5p   | PAK3     | 20190813 |
| hsa-miR-28-5p   | CDKN1A   | 20190813 |
| hsa-miR-378*    | SERPINE1 | 20353610 |
| hsa-miR-378*    | MYC      | 21242960 |
| hsa-miR-20b     | PAK3     | 20190813 |
| hsa-miR-20b     | MYC      | 15944709 |
| hsa-miR-20b     | CDKN1A   | 20190813 |
| hsa-miR-19a     | RB1      | 21388952 |
| hsa-miR-19a     | MYC      | 20008931 |
| hsa-miR-19a     | CDKN1A   | 20851997 |
| hsa-miR-19a     | CDK2     | 22731656 |
| hsa-miR-19b     | MYC      | 18632605 |
| hsa-miR-19b     | CDKN1A   | 20851997 |
| hsa-miR-19b     | CDK2     | 22731656 |
| hsa-miR-18b     | MYC      | 15944709 |
| hsa-miR-204     | SIRT1    | 22364258 |
| hsa-miR-204     | CDKN1A   | 19074875 |
| hsa-miR-127-3p  | MYC      | 19530237 |
| hsa-miR-127-3p  | CDK6     | 17581274 |
| hsa-miR-377     | CDKN1A   | 18716028 |
| hsa-miR-214     | MYC      | 20716115 |
| hsa-miR-214     | CDKN1A   | 20534588 |
| hsa-miR-199a-5p | SIRT1    | 20193759 |
| hsa-miR-199a-5p | MAPK14   | 18456660 |
| hsa-miR-199a-5p | FASN     | 20814244 |
| hsa-miR-410     | RB1      | 21170085 |
| hsa-miR-654-3p  | PAK3     | 20190813 |
| hsa-miR-654-3p  | CDKN1A   | 20190813 |
| hsa-miR-154*    | MYC      | 18451220 |
| hsa-miR-99a     | MYC      | 18451220 |
| hsa-miR-99a     | FASN     | 20497147 |
| hsa-miR-199a-3p | RB1      | 21049042 |
| hsa-miR-199a-3p | MAPK14   | 18456660 |

|                 |        |          |
|-----------------|--------|----------|
| hsa-miR-136*    | RB1    | 21049042 |
| hsa-miR-100     | SIRT1  | 20439489 |
| hsa-miR-100     | PLK1   | 22246341 |
| hsa-miR-100     | MYC    | 18451220 |
| hsa-miR-125b    | RELA   | 20144951 |
| hsa-miR-125b    | RB1    | 20049626 |
| hsa-miR-125b    | PEA15  | 18347971 |
| hsa-miR-125b    | MYC    | 18451220 |
| hsa-miR-125b    | GATA1  | 20194440 |
| hsa-miR-125b    | EP300  | 22245495 |
| hsa-miR-125b    | CDKN1A | 21118985 |
| hsa-miR-125b    | CDK6   | 19414119 |
| hsa-miR-125b    | BAX    | 23123599 |
| hsa-miR-299-5p  | PAK3   | 20190813 |
| hsa-miR-299-5p  | CDKN1A | 20190813 |
| hsa-miR-154     | MYC    | 18451220 |
| hsa-miR-214*    | MYC    | 20716115 |
| hsa-miR-214*    | CDKN1A | 20534588 |
| hsa-miR-495     | FLOT2  | 21258409 |
| hsa-miR-130a    | RELA   | 20144951 |
| hsa-miR-369-5p  | BRCA2  | 20810544 |
| hsa-miR-337-3p  | CDKN1A | 23137536 |
| hsa-miR-125b-2* | RB1    | 20428827 |
| hsa-miR-125b-2* | GATA1  | 20194440 |
| hsa-miR-125b-2* | BAX    | 21879257 |
| hsa-miR-433     | FASN   | 20497147 |
| hsa-miR-377*    | CDKN1A | 18716028 |

## 10.phosphatidyl\_inositol signalling

| miRNA              | mRNA   | Pubmed id | Reference |
|--------------------|--------|-----------|-----------|
| <b>hsa-miR-192</b> | PIK3CA | 19047896  |           |
| hsa-miR-192        | PTEN   | 19543271  |           |
| hsa-miR-203        | PTEN   | 20216554  |           |
| hsa-miR-1          | PTEN   | 20959496  |           |
| hsa-miR-1          | PTPMT1 | 18668040  |           |
| hsa-miR-1          | OCRL   | 15685193  |           |
| hsa-miR-1          | PIK3CA | 20959496  |           |
| hsa-miR-1          | CALM1  | 22719074  |           |
| hsa-miR-1          | CDIPT  | 18668040  |           |
| hsa-miR-133b       | PTEN   | 20959496  |           |
| hsa-miR-133b       | PIK3CA | 20959496  |           |
| hsa-miR-192*       | PIK3CA | 19047896  |           |
| hsa-miR-192*       | PTEN   | 19543271  |           |
| hsa-miR-146a       | PTEN   | 21730286  |           |
| hsa-miR-145        | PTEN   | 20716115  |           |
| hsa-miR-145        | PIK3CA | 23104321  |           |
| hsa-miR-133a       | PTEN   | 20959496  |           |
| hsa-miR-133a       | PIK3CA | 20959496  |           |
| hsa-miR-20a        | PTEN   | 19175831  |           |
| hsa-miR-17         | PTEN   | 22659298  |           |
| hsa-miR-17         | PIK3CA | 22659298  |           |
| hsa-miR-18a        | PTEN   | 19175831  |           |
| hsa-miR-378*       | PTEN   | 19175831  |           |
| hsa-miR-20b        | PTEN   | 19175831  |           |
| hsa-miR-19a        | PTEN   | 20851997  |           |
| hsa-miR-19a        | PIK3CA | 20505335  |           |
| hsa-miR-19b        | PIK3CA | 20505335  |           |
| hsa-miR-19b        | PTEN   | 20851997  |           |
| hsa-miR-18b        | PTEN   | 19175831  |           |
| hsa-miR-214        | PTEN   | 20716115  |           |
| hsa-miR-199a-5p    | PTEN   | 20814244  |           |
| hsa-miR-410        | PIK3R2 | 20844033  |           |
| hsa-miR-218        | PIK3R2 | 20844033  |           |
| hsa-miR-199a-3p    | PTEN   | 21049042  |           |
| hsa-miR-199a-3p    | PIK3CA | 20643939  |           |
| hsa-miR-136*       | PTEN   | 21049042  |           |
| hsa-miR-100        | PTEN   | 18199536  |           |
| hsa-miR-125b       | PTEN   | 18199536  |           |
| hsa-miR-214*       | PTEN   | 20716115  |           |
| hsa-miR-495        | PIK3CA | 20728239  |           |
| hsa-miR-130a       | PTEN   | 22614869  |           |
| hsa-miR-130a       | PIK3CA | 22614869  |           |

## 11.PPAR signalling

| miRNA        | mRNA    | Pubmed id Reference |
|--------------|---------|---------------------|
| hsa-miR-192  | CYP7A1  | 21085987            |
| hsa-miR-192  | ILK     | 21984124            |
| hsa-miR-192  | NOS2A   | 21085987            |
| hsa-miR-192  | PIK3CA  | 19047896            |
| hsa-miR-192  | TNF     | 21085987            |
| hsa-miR-194  | EP300   | 19569050            |
| hsa-miR-194  | JUN     | 19074548            |
| hsa-miR-194  | MYC     | 18451220            |
| hsa-miR-194  | TNF     | 22419229            |
| hsa-miR-203  | NCOA2   | 18381414            |
| hsa-miR-203  | JUN     | 19396864            |
| hsa-miR-203  | NOS2A   | 21093440            |
| hsa-miR-203  | PDGFA   | 19396864            |
| hsa-miR-203  | TNF     | 18419608            |
| hsa-miR-196b | JUN     | 19074548            |
| hsa-miR-1    | CYP27A1 | 18827405            |
| hsa-miR-1    | FABP3   | 23141496            |
| hsa-miR-1    | HSPA1A  | 18668040            |
| hsa-miR-1    | JUN     | 18668040            |
| hsa-miR-1    | LPL     | 18668040            |
| hsa-miR-1    | MMP1    | 15685193            |
| hsa-miR-1    | MYC     | 23022474            |
| hsa-miR-1    | NOS2A   | 19213952            |
| hsa-miR-1    | PIK3CA  | 20959496            |
| hsa-miR-1    | PTGS2   | 18668040            |
| hsa-miR-1    | RELA    | 15685193            |
| hsa-miR-1    | SP1     | 15685193            |
| hsa-miR-1    | UCP1    | 18937285            |
| hsa-miR-1    | FADS2   | 18668040            |
| hsa-miR-133b | MYC     | 18451220            |
| hsa-miR-133b | PIK3CA  | 20959496            |
| hsa-miR-192* | CYP7A1  | 21085987            |
| hsa-miR-192* | ILK     | 21984124            |
| hsa-miR-192* | NOS2A   | 21085987            |
| hsa-miR-192* | PIK3CA  | 19047896            |
| hsa-miR-192* | TNF     | 21085987            |
| hsa-miR-146a | CREBBP  | 23229111            |
| hsa-miR-146a | EP300   | 21885871            |
| hsa-miR-146a | JUN     | 19635561            |
| hsa-miR-146a | NFKBIA  | 18504431            |
| hsa-miR-146a | NOS2A   | 18791161            |
| hsa-miR-146a | MAPK3   | 21060679            |
| hsa-miR-146a | PTGS2   | 20522791            |
| hsa-miR-146a | RELA    | 19635561            |

|                |         |          |
|----------------|---------|----------|
| hsa-miR-146a   | TNF     | 16885212 |
| hsa-miR-145    | SLC27A4 | 22200372 |
| hsa-miR-145    | FABP4   | 20948521 |
| hsa-miR-145    | JUN     | 19074548 |
| hsa-miR-145    | MYC     | 19435428 |
| hsa-miR-145    | PIK3CA  | 23104321 |
| hsa-miR-145    | MAPK3   | 23104321 |
| hsa-miR-133a   | CYP27A1 | 18827405 |
| hsa-miR-133a   | MYC     | 18451220 |
| hsa-miR-133a   | PIK3CA  | 20959496 |
| hsa-miR-133a   | UCP1    | 18937285 |
| hsa-miR-20a    | CYP7A1  | 21085987 |
| hsa-miR-20a    | JUN     | 19074548 |
| hsa-miR-20a    | MYC     | 15944709 |
| hsa-miR-20a    | NOS2A   | 21085987 |
| hsa-miR-20a    | PPARG   | 21743293 |
| hsa-miR-20a    | RB1     | 16461460 |
| hsa-miR-20a    | TNF     | 21085987 |
| hsa-miR-17     | SLC27A4 | 19492978 |
| hsa-miR-17     | ME1     | 15183728 |
| hsa-miR-17     | MYC     | 15944709 |
| hsa-miR-17     | PIK3CA  | 17586726 |
| hsa-miR-17     | PPARA   | 17438130 |
| hsa-miR-17     | RB1     | 20049626 |
| hsa-miR-17     | RELA    | 20144951 |
| hsa-miR-17     | TNF     | 19949084 |
| hsa-miR-18a    | MYC     | 18632605 |
| hsa-miR-18a    | RB1     | 21388952 |
| hsa-miR-28-5p  | STAT5A  | 20445018 |
| hsa-miR-28-5p  | CD36    | 17379065 |
| hsa-miR-378*   | MYC     | 21242960 |
| hsa-miR-378*   | PPARG   | 20484008 |
| hsa-miR-20b    | MYC     | 15944709 |
| hsa-miR-20b    | PPARG   | 21042576 |
| hsa-miR-19a    | MYC     | 18632605 |
| hsa-miR-19a    | PIK3CA  | 20505335 |
| hsa-miR-19a    | RB1     | 21388952 |
| hsa-miR-19b    | ME1     | 15183728 |
| hsa-miR-19b    | MYC     | 18632605 |
| hsa-miR-19b    | PIK3CA  | 20505335 |
| hsa-miR-18b    | MYC     | 15944709 |
| hsa-miR-204    | SLC27A4 | 20634564 |
| hsa-miR-376c   | ME1     | 15183728 |
| hsa-miR-127-3p | JUN     | 19396864 |
| hsa-miR-127-3p | MYC     | 19530237 |
| hsa-miR-127-3p | PDGFA   | 19396864 |

|                 |        |          |
|-----------------|--------|----------|
| hsa-miR-127-3p  | NROB2  | 18776219 |
| hsa-miR-377     | CYP7A1 | 21085987 |
| hsa-miR-377     | NOS2A  | 21085987 |
| hsa-miR-377     | TNF    | 21085987 |
| hsa-miR-214     | JUN    | 20498046 |
| hsa-miR-214     | MYC    | 19435428 |
| hsa-miR-199a-5p | MAPK1  | 18456660 |
| hsa-miR-410     | JUN    | 21170085 |
| hsa-miR-410     | RB1    | 21170085 |
| hsa-miR-154*    | ME1    | 15183728 |
| hsa-miR-154*    | MYC    | 18451220 |
| hsa-miR-154*    | CD36   | 17379065 |
| hsa-miR-99a     | JUN    | 19074548 |
| hsa-miR-99a     | MYC    | 18451220 |
| hsa-miR-199a-3p | PIK3CA | 20643939 |
| hsa-miR-199a-3p | MAPK1  | 18456660 |
| hsa-miR-199a-3p | RB1    | 21049042 |
| hsa-miR-199a-3p | TNF    | 19572984 |
| hsa-miR-136*    | ME1    | 15183728 |
| hsa-miR-136*    | RB1    | 21049042 |
| hsa-miR-136*    | CD36   | 17379065 |
| hsa-miR-100     | JUN    | 19074548 |
| hsa-miR-100     | MYC    | 18451220 |
| hsa-miR-100     | TNF    | 17640343 |
| hsa-miR-125b    | EP300  | 22245495 |
| hsa-miR-125b    | JUN    | 19074548 |
| hsa-miR-125b    | MYC    | 18451220 |
| hsa-miR-125b    | NFKBIA | 20435889 |
| hsa-miR-125b    | MAPK3  | 21060679 |
| hsa-miR-125b    | RB1    | 20049626 |
| hsa-miR-125b    | RELA   | 19997496 |
| hsa-miR-125b    | RXRA   | 20306291 |
| hsa-miR-125b    | NR2F1  | 20306291 |
| hsa-miR-125b    | TNF    | 18419608 |
| hsa-miR-125b    | NRIP1  | 21375733 |
| hsa-miR-154     | ME1    | 15183728 |
| hsa-miR-154     | MYC    | 18451220 |
| hsa-miR-154     | CD36   | 17379065 |
| hsa-miR-214*    | JUN    | 20498046 |
| hsa-miR-214*    | MYC    | 19435428 |
| hsa-miR-495     | PIK3CA | 20728239 |
| hsa-miR-379     | JUN    | 19396864 |
| hsa-miR-379     | PDGFA  | 19396864 |
| hsa-miR-299-3p  | JUN    | 19396864 |
| hsa-miR-299-3p  | PDGFA  | 19396864 |
| hsa-miR-323-3p  | TNF    | 22562984 |

|                 |        |          |
|-----------------|--------|----------|
| hsa-miR-130a    | ME1    | 15183728 |
| hsa-miR-130a    | PIK3CA | 20505758 |
| hsa-miR-130a    | RELA   | 20144951 |
| hsa-miR-758     | APOA1  | 21885853 |
| hsa-miR-369-5p  | FABP4  | 21136442 |
| hsa-miR-369-5p  | ME1    | 15183728 |
| hsa-miR-369-5p  | TNF    | 18048652 |
| hsa-miR-369-5p  | ADIPOQ | 21136442 |
| hsa-miR-125b-2* | MAPK3  | 21060679 |
| hsa-miR-125b-2* | RB1    | 20049626 |
| hsa-miR-433     | NR0B2  | 18776219 |
| hsa-miR-377*    | CYP7A1 | 21085987 |
| hsa-miR-377*    | NOS2A  | 21085987 |
| hsa-miR-377*    | TNF    | 21085987 |

## 12.RB1 signalling

| miRNA           | mRNA   | Pubmed id | Reference |
|-----------------|--------|-----------|-----------|
| hsa-miR-215     | TP53   | 19074876  |           |
| hsa-miR-192     | TP53   | 19074875  |           |
| hsa-miR-194     | TP53   | 22264233  |           |
| hsa-miR-203     | TP53   | 20216554  |           |
| hsa-miR-1       | CDK4   | 15685193  |           |
| hsa-miR-1       | TP53   | 19229884  |           |
| hsa-miR-192*    | TP53   | 22264233  |           |
| hsa-miR-146a    | TP53   | 18633110  |           |
| hsa-miR-145     | TP53   | 21349819  |           |
| hsa-miR-145     | CDK4   | 21092188  |           |
| hsa-miR-20a     | TP53   | 18941111  |           |
| hsa-miR-20a     | RB1    | 16461460  |           |
| hsa-miR-20a     | CDK2   | 22731656  |           |
| hsa-miR-17      | TP53   | 19347736  |           |
| hsa-miR-17      | ATM    | 19477219  |           |
| hsa-miR-17      | RB1    | 20643754  |           |
| hsa-miR-17      | CDK2   | 22731656  |           |
| hsa-miR-18a     | ATM    | 23229340  |           |
| hsa-miR-18a     | RB1    | 21388952  |           |
| hsa-miR-18a     | CDK2   | 22731656  |           |
| hsa-miR-18a     | TP53   | 21388952  |           |
| hsa-miR-28-5p   | TP53   | 20923760  |           |
| hsa-miR-378*    | TP53   | 20078964  |           |
| hsa-miR-19a     | TP53   | 21388952  |           |
| hsa-miR-19a     | RB1    | 21388952  |           |
| hsa-miR-19a     | CDK2   | 22731656  |           |
| hsa-miR-19b     | CDK2   | 22731656  |           |
| hsa-miR-19b     | TP53   | 18728182  |           |
| hsa-miR-204     | TP53   | 19074875  |           |
| hsa-miR-410     | CDC2   | 21170085  |           |
| hsa-miR-410     | RB1    | 21170085  |           |
| hsa-miR-410     | TP53   | 21170085  |           |
| hsa-miR-99a     | TP53   | 19843843  |           |
| hsa-miR-199a-3p | RB1    | 21049042  |           |
| hsa-miR-136*    | RB1    | 21049042  |           |
| hsa-miR-100     | CDC25C | 19739117  |           |
| hsa-miR-100     | TP53   | 20078964  |           |
| hsa-miR-125b    | TP53   | 21347262  |           |
| hsa-miR-125b    | RB1    | 20049626  |           |
| hsa-miR-125b    | ATM    | 18674748  |           |
| hsa-miR-130a    | TP53   | 19948396  |           |
| hsa-miR-337-3p  | TP53   | 23137536  |           |
| hsa-miR-125b-2* | TP53   | 19890372  |           |
| hsa-miR-125b-2* | RB1    | 20428827  |           |

### 13.WNT signalling

| miRNA        | mRNA    | Pubmed id | Reference |
|--------------|---------|-----------|-----------|
| hsa-miR-215  | TP53    | 19074875  |           |
| hsa-miR-192  | APC     | 19047896  |           |
| hsa-miR-192  | CCND1   | 19205878  |           |
| hsa-miR-192  | CCND2   | 21128228  |           |
| hsa-miR-192  | CTNNB1  | 19047896  |           |
| hsa-miR-192  | SMAD2   | 20488955  |           |
| hsa-miR-192  | SMAD3   | 20488955  |           |
| hsa-miR-192  | TP53    | 19047896  |           |
| hsa-miR-194  | CCND1   | 19074548  |           |
| hsa-miR-194  | EP300   | 19569050  |           |
| hsa-miR-194  | FZD6    | 21887698  |           |
| hsa-miR-194  | JUN     | 19074548  |           |
| hsa-miR-194  | MYC     | 18451220  |           |
| hsa-miR-194  | RAC1    | 19892940  |           |
| hsa-miR-194  | TP53    | 19074875  |           |
| hsa-miR-203  | JUN     | 19396864  |           |
| hsa-miR-203  | LEF1    | 19015519  |           |
| hsa-miR-203  | MAPK8   | 22205737  |           |
| hsa-miR-203  | PPP2R1B | 21248297  |           |
| hsa-miR-203  | TP53    | 18483491  |           |
| hsa-miR-196b | CCND1   | 19074548  |           |
| hsa-miR-196b | JUN     | 19074548  |           |
| hsa-miR-1    | APC     | 19136465  |           |
| hsa-miR-1    | CCND1   | 19074548  |           |
| hsa-miR-1    | CCND2   | 20054351  |           |
| hsa-miR-1    | CHP     | 15685193  |           |
| hsa-miR-1    | CSNK1D  | 18668040  |           |
| hsa-miR-1    | CTNNB1  | 18668040  |           |
| hsa-miR-1    | CXXC4   | 16908844  |           |
| hsa-miR-1    | DVL2    | 15685193  |           |
| hsa-miR-1    | JUN     | 18668040  |           |
| hsa-miR-1    | MYC     | 23022474  |           |
| hsa-miR-1    | PPP3CA  | 18668040  |           |
| hsa-miR-1    | PPP3R1  | 18668040  |           |
| hsa-miR-1    | PRKACA  | 19229884  |           |
| hsa-miR-1    | RHOA    | 17468766  |           |
| hsa-miR-1    | TP53    | 19229884  |           |
| hsa-miR-1    | WNT5A   | 18668040  |           |
| hsa-miR-133b | APC     | 19136465  |           |
| hsa-miR-133b | LRP5    | 23143922  |           |
| hsa-miR-133b | MYC     | 18451220  |           |
| hsa-miR-133b | NFATC4  | 20173049  |           |
| hsa-miR-133b | RHOA    | 17468766  |           |
| hsa-miR-192* | APC     | 19047896  |           |

|              |         |          |
|--------------|---------|----------|
| hsa-miR-192* | CCND1   | 19205878 |
| hsa-miR-192* | CCND2   | 21128228 |
| hsa-miR-192* | CTNNB1  | 19047896 |
| hsa-miR-192* | SMAD2   | 20488955 |
| hsa-miR-192* | SMAD3   | 20488955 |
| hsa-miR-192* | TP53    | 19047896 |
| hsa-miR-146a | CREBBP  | 23229111 |
| hsa-miR-146a | EP300   | 21885871 |
| hsa-miR-146a | JUN     | 19635561 |
| hsa-miR-146a | LEF1    | 21211043 |
| hsa-miR-146a | MAPK8   | 20525168 |
| hsa-miR-146a | ROCK1   | 18174313 |
| hsa-miR-146a | SMAD3   | 22307526 |
| hsa-miR-146a | SMAD4   | 20577838 |
| hsa-miR-146a | TP53    | 18633110 |
| hsa-miR-145  | CCND1   | 17616664 |
| hsa-miR-145  | CTNNB1  | 19996288 |
| hsa-miR-145  | FBXW11  | 15131085 |
| hsa-miR-145  | JUN     | 19074548 |
| hsa-miR-145  | LEF1    | 21211043 |
| hsa-miR-145  | MYC     | 19435428 |
| hsa-miR-145  | PPP2R1B | 21248297 |
| hsa-miR-145  | PPP3CA  | 19915607 |
| hsa-miR-145  | SMAD2   | 21723890 |
| hsa-miR-145  | SMAD3   | 21712382 |
| hsa-miR-145  | SMAD4   | 21712382 |
| hsa-miR-145  | TP53    | 18172508 |
| hsa-miR-145  | VANGL1  | 20098684 |
| hsa-miR-133a | APC     | 19136465 |
| hsa-miR-133a | CCND1   | 19015276 |
| hsa-miR-133a | CCND2   | 20054351 |
| hsa-miR-133a | MYC     | 18451220 |
| hsa-miR-133a | NFATC4  | 20173049 |
| hsa-miR-133a | RHOA    | 17468766 |
| hsa-miR-133a | SMAD2   | 23102905 |
| hsa-miR-20a  | CCND1   | 18695042 |
| hsa-miR-20a  | JUN     | 19074548 |
| hsa-miR-20a  | MYC     | 15944709 |
| hsa-miR-20a  | TP53    | 18941111 |
| hsa-miR-17   | APC     | 19136465 |
| hsa-miR-17   | CCND1   | 18695042 |
| hsa-miR-17   | MAPK9   | 18700987 |
| hsa-miR-17   | MYC     | 15944709 |
| hsa-miR-17   | SMAD4   | 20940405 |
| hsa-miR-17   | TP53    | 16878133 |
| hsa-miR-18a  | MYC     | 18632605 |

|                 |          |          |
|-----------------|----------|----------|
| hsa-miR-18a     | SMAD2    | 21402698 |
| hsa-miR-18a     | SMAD3    | 23249750 |
| hsa-miR-18a     | TP53     | 21388952 |
| hsa-miR-28-5p   | TP53     | 20923760 |
| hsa-miR-378*    | CCND1    | 21242960 |
| hsa-miR-378*    | LEF1     | 21211043 |
| hsa-miR-378*    | MYC      | 21242960 |
| hsa-miR-378*    | TP53     | 20078964 |
| hsa-miR-20b     | MYC      | 15944709 |
| hsa-miR-19a     | CCND1    | 19538740 |
| hsa-miR-19a     | MYC      | 18632605 |
| hsa-miR-19a     | TP53     | 18728182 |
| hsa-miR-19b     | MYC      | 18632605 |
| hsa-miR-19b     | TP53     | 18728182 |
| hsa-miR-18b     | MYC      | 15944709 |
| hsa-miR-204     | CTNNBIP1 | 22736612 |
| hsa-miR-204     | TP53     | 19074875 |
| hsa-miR-127-3p  | JUN      | 19396864 |
| hsa-miR-127-3p  | MYC      | 19530237 |
| hsa-miR-376a    | PPP2R2A  | 20237410 |
| hsa-miR-214     | APC      | 19701500 |
| hsa-miR-214     | CCND1    | 22362728 |
| hsa-miR-214     | CCND2    | 20498046 |
| hsa-miR-214     | CTNNB1   | 19701500 |
| hsa-miR-214     | JUN      | 20498046 |
| hsa-miR-214     | MAPK8    | 19859982 |
| hsa-miR-214     | MYC      | 19435428 |
| hsa-miR-199a-5p | CCND1    | 22362728 |
| hsa-miR-199a-5p | MAPK8    | 18456660 |
| hsa-miR-199a-5p | MAPK9    | 18456660 |
| hsa-miR-410     | JUN      | 21170085 |
| hsa-miR-410     | SFRP2    | 23154418 |
| hsa-miR-410     | TP53     | 21170085 |
| hsa-miR-410     | WNT5A    | 23154418 |
| hsa-miR-154*    | CCND2    | 21128228 |
| hsa-miR-154*    | MYC      | 18451220 |
| hsa-miR-99a     | CCND1    | 19074548 |
| hsa-miR-99a     | JUN      | 19074548 |
| hsa-miR-99a     | MYC      | 18451220 |
| hsa-miR-99a     | TP53     | 19843843 |
| hsa-miR-199a-3p | MAPK8    | 18456660 |
| hsa-miR-199a-3p | MAPK9    | 18456660 |
| hsa-miR-136*    | PPP2R2A  | 20237410 |
| hsa-miR-100     | CCND1    | 19074548 |
| hsa-miR-100     | JUN      | 19074548 |
| hsa-miR-100     | MYC      | 18451220 |

|                 |         |          |
|-----------------|---------|----------|
| hsa-miR-100     | TP53    | 19843843 |
| hsa-miR-125b    | CCND1   | 19074548 |
| hsa-miR-125b    | EP300   | 22245495 |
| hsa-miR-125b    | JUN     | 19074548 |
| hsa-miR-125b    | MAP3K7  | 20306291 |
| hsa-miR-125b    | MYC     | 18451220 |
| hsa-miR-125b    | TP53    | 17962954 |
| hsa-miR-154     | CCND2   | 21128228 |
| hsa-miR-154     | MYC     | 18451220 |
| hsa-miR-214*    | APC     | 19701500 |
| hsa-miR-214*    | CCND1   | 22362728 |
| hsa-miR-214*    | CCND2   | 20498046 |
| hsa-miR-214*    | CTNNB1  | 19701500 |
| hsa-miR-214*    | JUN     | 20498046 |
| hsa-miR-214*    | MAPK8   | 19859982 |
| hsa-miR-214*    | MYC     | 19435428 |
| hsa-miR-379     | JUN     | 19396864 |
| hsa-miR-299-3p  | AXIN2   | 23380809 |
| hsa-miR-299-3p  | JUN     | 19396864 |
| hsa-miR-130a    | TP53    | 19948396 |
| hsa-miR-337-3p  | CCND1   | 22894925 |
| hsa-miR-337-3p  | CSNK2A1 | 23137536 |
| hsa-miR-337-3p  | TP53    | 23137536 |
| hsa-miR-125b-2* | TP53    | 19818772 |
| hsa-miR-433     | CCND1   | 22362728 |
| hsa-miR-433     | SFRP2   | 23154418 |
| hsa-miR-433     | WNT5A   | 23154418 |
