# Supplementary material
Source: PubMed Central journal article supplement (PMC5528780)

Row Z-Score

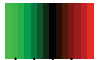

-5 0 5

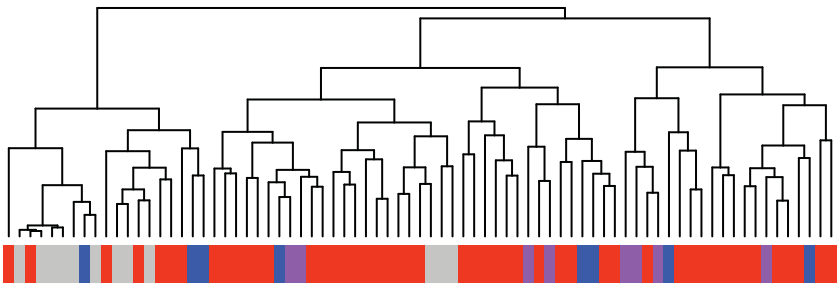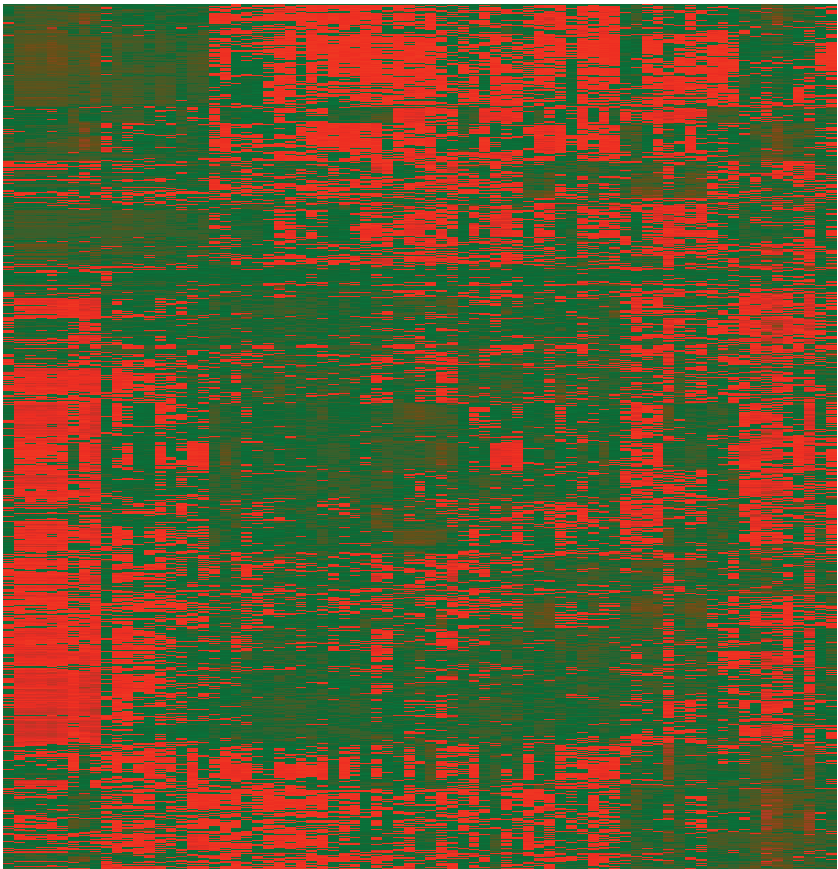

Pancreatic-duct (P) Bile duct (P) Ampulla (P) Normal

Supplement: MOL2-9-758-s003.pdf [file MOL2-9-758-s003.pdf]

Row Z-Score

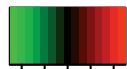

-4 0 4

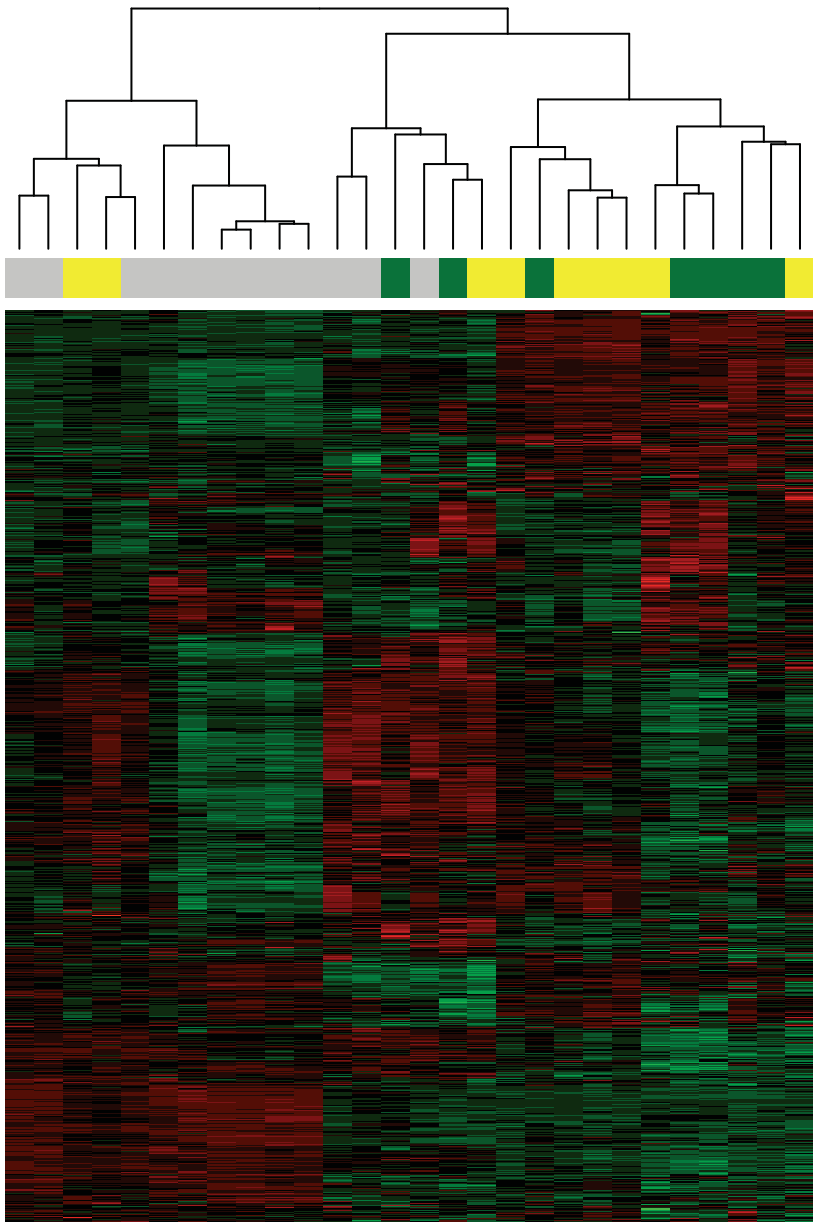

Ampulla (l)

Duodenum (l)

Normal

Supplement: MOL2-9-758-s004.pdf [file MOL2-9-758-s004.pdf]

Row Z-Score

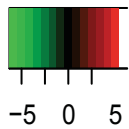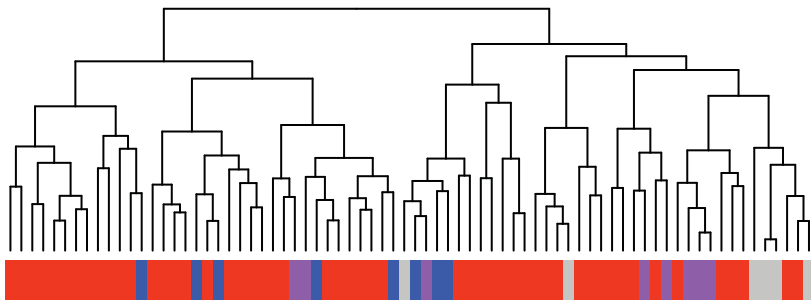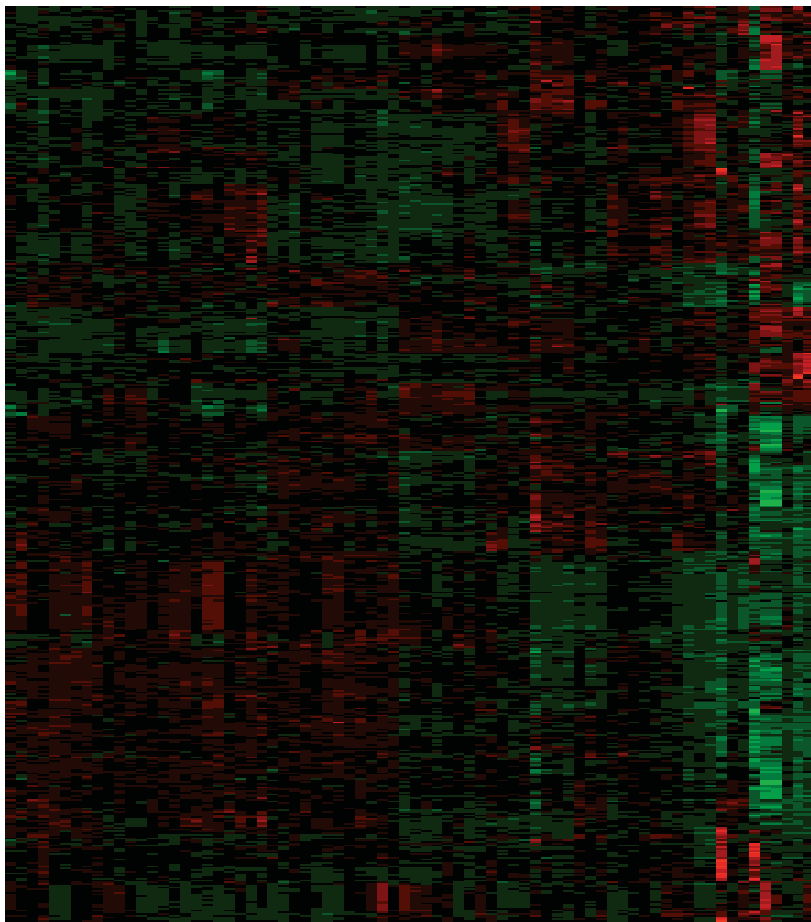

Pancreatic-  
duct (P)

Bile duct (P)

Ampulla (P)

Normal

Supplement: MOL2-9-758-s005.pdf [file MOL2-9-758-s005.pdf]

Row Z-Score

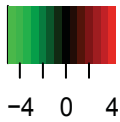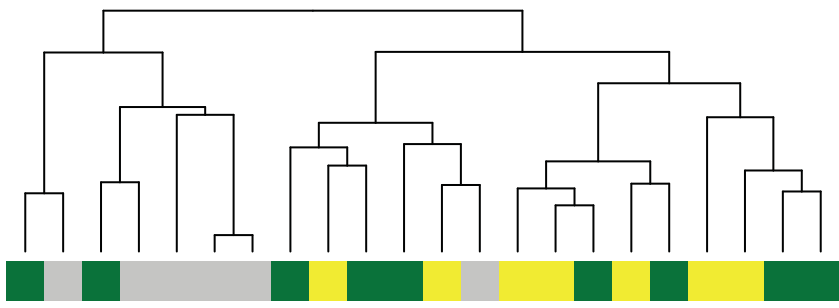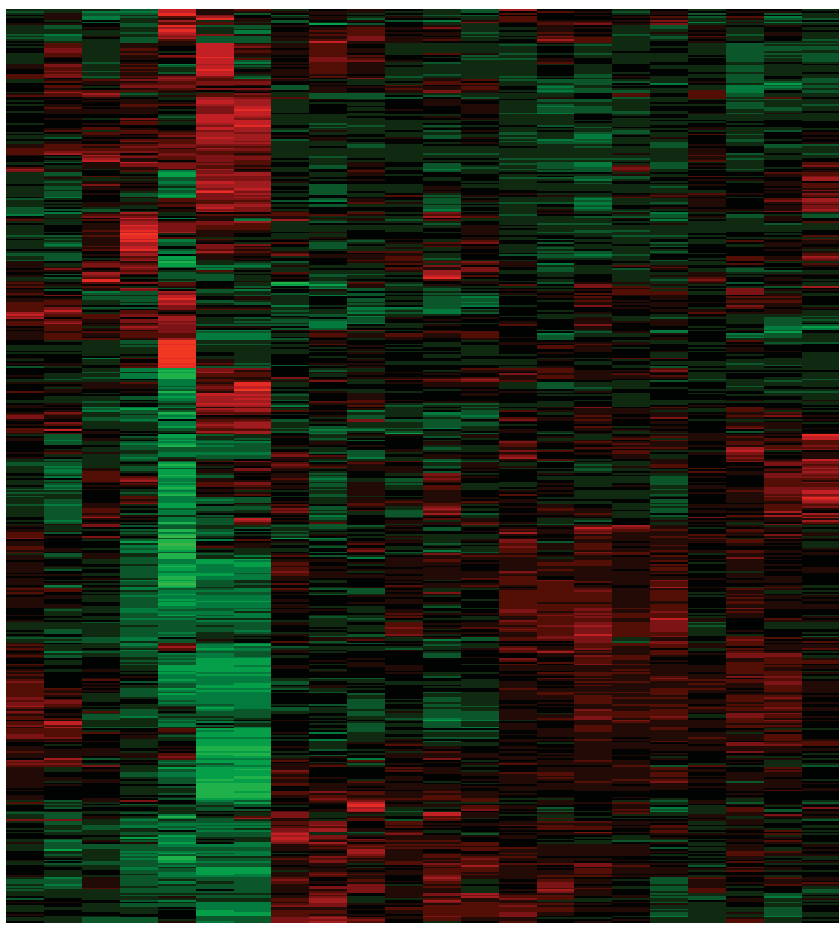

Ampulla (1)      Duodenum (1)      Normal

Supplement: MOL2-9-758-s006.pdf [file MOL2-9-758-s006.pdf]

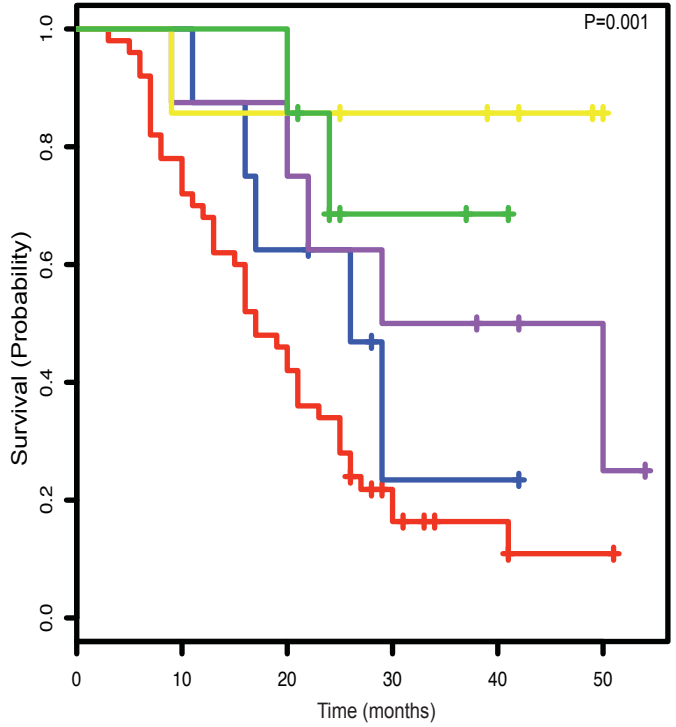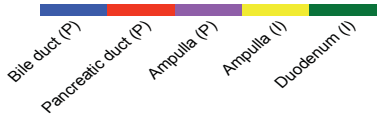

Supplement: MOL2-9-758-s007.pdf [file MOL2-9-758-s007.pdf]
